# Supplementary material for: A Multiomics Profiling Based on Online Database Revealed Prognostic Biomarkers of BLCA
Source: Hindawi journal article supplement (doi:10.1155/2022/2449449), 2022-01-01

**A**

Optimal number of clusters

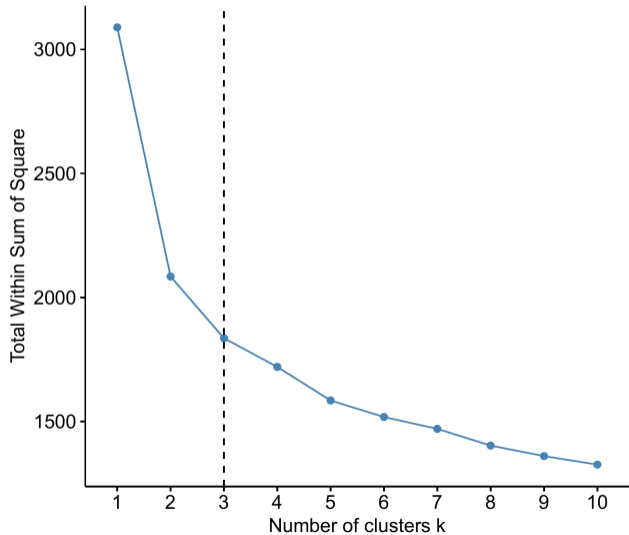**B**

Cluster plot

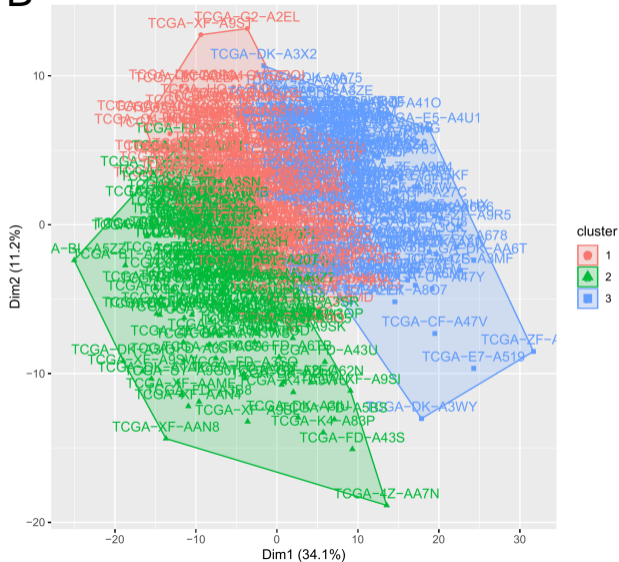

Supplement: f1 [file 2449449.f1.pdf]
